# Supplementary material for: Real-Time Cytotoxicity Assay for Rapid and Sensitive Detection of Ricin from Complex Matrices
Source: PLOS journal article supplement (doi:10.1371/journal.pone.0035360), 2012-04-19
Supplement: S5 (10.1371/journal.pone.0035360.s005) [file journal.pone.0035360.s005]

**Table S-4. IC<sub>50</sub> values for ricin spiked into different food matrices.**

Vero cells were exposed to ricin spiked into milk, carrot juice, baby food or medium, respectively. The IC<sub>50</sub> values of serial dilutions of ricin in the complex matrices (see Figure 5) after 24 h and 42 h are shown.

| Matrix       | IC <sub>50</sub> after 24 hours        |                  | IC <sub>50</sub> after 42 hours        |                  |
|--------------|----------------------------------------|------------------|----------------------------------------|------------------|
|              | 1:14 diluted matrix added to the cells | Undiluted matrix | 1:14 diluted matrix added to the cells | Undiluted matrix |
| Medium       | 0.4 ng/mL                              | 5.6 ng/mL        | 0.1 ng/mL                              | 1.4 ng/mL        |
| Milk         | 14.3 ng/mL                             | 200.2 ng/mL      | 4.2 ng/mL                              | 58.8 ng/mL       |
| Carrot juice | 0.4 ng/mL                              | 5.6 ng/mL        | 0.1 ng/mL                              | 1.4 ng/mL        |
| Baby food    | 0.4 ng/mL                              | 5.6 ng/mL        | 0.1 ng/mL                              | 1.4 ng/mL        |
